# Supplementary material
Source: HighWire-hosted journal article supplement (https://erj.ersjournals.com/content/57/6/2003317)

# Outcome of Unilateral and Bilateral Hypoxaemic Respiratory Failure. Insights from the Lung Safe Study

Online supplement

|                                                                                                                                                    |    |
|----------------------------------------------------------------------------------------------------------------------------------------------------|----|
| Table E1: Global and adjusted p-values for pairwise comparisons .....                                                                              | 2  |
| Table E2: Use of adjunct treatments in the 3 groups.....                                                                                           | 4  |
| Table E3: Characteristics of survivors vs non-survivors (excluding CHF) .....                                                                      | 5  |
| Table E4: Multivariable analyses of factors associated with hospital death in patients with unilateral infiltrate or ARDS .....                    | 7  |
| Table E5: Multivariable analysis of variables associated with hospital mortality in patients with unilateral-infiltrate...                         | 8  |
| Table E6: Multivariable analysis of variables associated with hospital mortality in unilateral infiltrate patients with 2 quadrants involved ..... | 9  |
| Table E7: Baseline and outcomes of unilateral infiltrate patients according to their evolution .....                                               | 10 |
| Table E8: Multivariable analysis of factors associated with evolution to ARDS in patients with initial unilateral infiltrate.....                  | 11 |
| Figure E1: Distribution of tidal volume vs plateau pressure on day 1 in patients with unilateral infiltrate or with ARDS .....                     | 12 |

Table E1: Global and adjusted p-values for pairwise comparisons

|                                    | Global p-value | ARDS vs CHF | unilateral infiltrate vs ARDS |
|------------------------------------|----------------|-------------|-------------------------------|
| Age                                | <0.001         | <0.001      | 0.277                         |
| Female gender                      | 0.056          | 0.296       | 0.296                         |
| BMI                                | 0.061          | 0.736       | 0.051                         |
| Illness Severity Indices           |                |             |                               |
| SOFA Score                         | <0.001         | 0.376       | <0.001                        |
| Non-pulmonary SOFA score           | <0.001         | 0.146       | 0.001                         |
| Number of CXR quadrants            | <0.001         | <0.001      | 0.000                         |
| Bilateral opacities                | <0.001         | <0.001      | 0.000                         |
| PaCO <sub>2</sub>                  | 0.003          | 0.005       | 0.165                         |
| pH                                 | <0.001         | 0.657       | <0.001                        |
| PaO <sub>2</sub> /FiO <sub>2</sub> | <0.001         | 0.069       | 0.000                         |
| Worst PF in the 2 first days       | <0.001         | 0.374       | 0.000                         |
| Initial Severity                   | <0.001         | 0.190       | <0.001                        |
| Comorbidities                      |                |             |                               |
| Diabetes                           | 0.009          | 0.010       | 0.999                         |
| COPD                               | 0.001          | 0.030       | 0.023                         |
| Chronic Renal Failure              | <0.001         | <0.001      | 0.958                         |
| Immunosuppression                  | <0.001         | <0.001      | 0.194                         |
| Chronic Cardiac Failure            | <0.001         | <0.001      | 0.924                         |
| Chronic Liver Failure              | 0.157          | 0.252       | 0.638                         |
| At least 1 comorbidity             | 0.004          | 0.003       | 0.968                         |
| “Cause of hypoxemia”               |                |             |                               |
| Pneumonia                          | <0.001         | <0.001      | 0.025                         |
| Non pulmonary Sepsis               | <0.001         | <0.001      | 0.049                         |
| Gastric aspiration                 | <0.001         | 0.002       | 0.009                         |
| Trauma                             | 0.002          | 0.018       | 0.069                         |
| Pancreatitis                       | 0.013          | 0.023       | 0.262                         |
| Pulmonary contusion                | 0.023          | 0.117       | 0.125                         |
| Pulmonary Vasculitis               | 0.356          | 0.589       | 0.589                         |

|                         |        |        |        |
|-------------------------|--------|--------|--------|
| Non cardiogenic Shock   | 0.001  | 0.002  | 0.096  |
| Overdose                | 0.018  | 0.018  | 0.231  |
| TRALI                   | 0.412  | 0.976  | 0.662  |
| CHF                     | <0.001 | <0.001 | 0.003  |
| COPD                    | <0.001 | 0.101  | 0.900  |
| Asthma                  | 0.101  | <0.001 | <0.001 |
|                         |        |        |        |
| No Cause identified     | 0.002  | 0.002  | 0.707  |
| Ventilation Management  |        |        |        |
| VT                      | <0.001 | <0.001 | 0.010  |
| RR                      | <0.001 | 0.001  | <0.001 |
| PEEP                    | <0.001 | <0.001 | <0.001 |
| FiO2                    | <0.001 | 0.668  | <0.001 |
| Plateau pressure        | <0.001 | 0.061  | <0.001 |
| Driving pressure        | <0.001 | 0.367  | <0.001 |
| PIP                     | <0.001 | <0.001 | <0.001 |
| Minute ventilation      | <0.001 | 0.008  | 0.002  |
| Outcomes                |        |        |        |
| Duration of invasive MV | <0.001 | <0.001 | <0.001 |
| VFD                     | <0.001 | 0.064  | <0.001 |
| ICU Length of Stay      | <0.001 | <0.001 | 0.007  |
| Hospital Length of Stay | <0.001 | <0.001 | 0.902  |
| ICU mortality           | <0.001 | 0.515  | <0.001 |
| Hospital mortality      | <0.001 | 0.282  | <0.001 |

Table E2: Use of adjunct treatments in the 3 groups

| Var                     | ALL<br>N=3176 | unilateral<br>infiltrate<br>N=722 | ARDS<br>N=2193 | CHF<br>N=261 | Global<br>p-value | p-value<br>unilat vs<br>ARDS | p-value<br>unilat vs<br>CHF | p-value<br>unilat vs CHF | N    |
|-------------------------|---------------|-----------------------------------|----------------|--------------|-------------------|------------------------------|-----------------------------|--------------------------|------|
| Prone                   | 186 (5.9%)    | 16 (2.2%)                         | 167 (7.6%)     | 3 (1.1%)     | <0.001            | <0.001                       | 0.418                       | <0.001                   | 3176 |
| ECMO                    | 18 (0.6%)     | 0 (0.0%)                          | 17 (0.8%)      | 1 (0.4%)     | 0.026             | 0.032                        | 0.398                       | 0.713                    | 3176 |
| NMBA                    | 575 (18.1%)   | 87 (12.0%)                        | 457 (20.8%)    | 31 (11.9%)   | <0.001            | <0.001                       | 1.000                       | 0.001                    | 3176 |
| Recruitment<br>Maneuver | 575 (18.1%)   | 90 (12.5%)                        | 455 (20.7%)    | 30 (11.5%)   | <0.001            | <0.001                       | 0.764                       | 0.001                    | 3176 |
| Inhaled VD              | 191 (6.0%)    | 25 (3.5%)                         | 152 (6.9%)     | 14 (5.4%)    | 0.003             | 0.003                        | 0.367                       | 0.411                    | 3176 |
| HFO                     | 27 (0.9%)     | 2 (0.3%)                          | 25 (1.1%)      | 0 (0.0%)     | 0.022             | 0.153                        | 1.000                       | 0.153                    | 3176 |
| Any Rescue treatment    | 1079 (34.0%)  | 178 (24.7%)                       | 835 (38.1%)    | 66 (25.3%)   | <0.001            | <0.001                       | 0.905                       | <0.001                   | 3176 |

Table E3: Characteristics of survivors vs non-survivors (excluding CHF)

|                                                      | ALL<br>N=2904  | Survivors<br>N=1793 | Deceased<br>N=1111 | p-value | N    |
|------------------------------------------------------|----------------|---------------------|--------------------|---------|------|
| Age                                                  | 61±7           | 59±17               | 65±17              | <0.001  | 2904 |
| Female gender                                        | 1069 (37%)     | 656 (37%)           | 413 (37%)          | 0.780   | 2904 |
| Weight                                               | 77.2±22.8      | 78.9±24.9           | 74.5±18.5          | <0.001  | 2758 |
| BMI                                                  | 27.1±8.1       | 27.6±9.0            | 26.5±6.3           | <0.001  | 2691 |
| Illness Severity Indices                             |                |                     |                    |         |      |
| SOFA Score                                           | 9.6 [7.0;12.0] | 9.0 [6.0;12.0]      | 11.0 [8.0;14.0]    | <0.001  | 2893 |
| Non-pulmonary SOFA score                             | 6.2 [4.0;9.0]  | 6.0 [3.8;8.0]       | 8.0 [5.0;11.0]     | <0.001  | 2872 |
| CXR quadrants involved                               |                |                     |                    | <0.001  | 2752 |
| 1                                                    | 428 (16%)      | 300 (18%)           | 128 (12%)          |         |      |
| 2                                                    | 1090 (40%)     | 704 (42%)           | 386 (36%)          |         |      |
| 3                                                    | 505 (18%)      | 289 (17%)           | 216 (20%)          |         |      |
| 4                                                    | 729 (27%)      | 399 (24%)           | 330 (31%)          |         |      |
| Bilateral opacities                                  | 2184 (75%)     | 1302 (73%)          | 882 (79%)          | <0.001  | 2904 |
| PaCO <sub>2</sub>                                    | 46±15          | 46±14               | 46±16              | 0.980   | 2867 |
| pH                                                   | 7.33±0.12      | 7.35±0.11           | 7.30±0.14          | <0.001  | 2867 |
| PaO <sub>2</sub> /FiO <sub>2</sub>                   | 168±68         | 173±68              | 160±68             | <0.001  | 2893 |
| Initial Severity                                     |                |                     |                    | <0.001  | 2904 |
| Mild                                                 | 988 (34.0)     | 663 (37%)           | 325 (29%)          |         |      |
| Moderate                                             | 1334 (46%)     | 817 (46%)           | 517 (47%)          |         |      |
| Severe                                               | 582 (20%)      | 313 (18%)           | 269 (24%)          |         |      |
| Comorbidities                                        |                |                     |                    |         |      |
| Diabetes                                             | 635 (22%)      | 372 (21%)           | 263 (24%)          | 0.071   | 2904 |
| COPD                                                 | 623 (22%)      | 385 (22%)           | 238 (21%)          | 1.000   | 2904 |
| Chronic Renal Failure                                | 277 (9.5%)     | 152 (8.5%)          | 125 (11%)          | 0.016   | 2904 |
| Immunosuppression                                    | 582 (20.0%)    | 288 (16%)           | 294 (27%)          | <0.001  | 2904 |
| Chronic Cardiac Failure                              | 280 (10%)      | 153 (9%)            | 127 (11%)          | 0.012   | 2904 |
| Chronic Liver Failure                                | 124 (4%)       | 43 (2%)             | 81 (7%)            | <0.001  | 2904 |
| At least 1 comorbidity                               | 1701 (59%)     | 955 (53%)           | 746 (67%)          | <0.001  | 2904 |
| “Cause of hypoxemia” (more than 1 cause is possible) |                |                     |                    |         |      |
| Pneumonia                                            | 1923 (66%)     | 1180 (66%)          | 743 (67%)          | 0.583   | 2904 |
| Non pulmonary Sepsis                                 | 483 (17%)      | 259 (14%)           | 224 (20%)          | <0.001  | 2904 |
| Gastric aspiration                                   | 503 (17%)      | 309 (17%)           | 194 (18%)          | 0.914   | 2904 |
| Trauma                                               | 150 (5%)       | 122 (7%)            | 28 (3%)            | <0.001  | 2904 |
| Pancreatitis                                         | 57 (2%)        | 29 (2%)             | 28 (3%)            | 0.117   | 2904 |
| Pulmonary contusion                                  | 108 (4%)       | 86 (5%)             | 22 (2%)            | <0.001  | 2904 |
| Pulmonary Vasculitis                                 | 34 (1%)        | 14 (1%)             | 20 (2%)            | 0.021   | 2904 |
| Non cardiogenic Shock                                | 229 (8%)       | 114 (6%)            | 115 (10%)          | <0.001  | 2904 |
| Overdose                                             | 66 (2%)        | 54 (3%)             | 12 (1%)            | 0.001   | 2904 |
| TRALI                                                | 122 (4%)       | 67 (4%)             | 55 (5%)            | 0.136   | 2904 |
| CHF                                                  | 399 (14%)      | 206 (12%)           | 193 (17%)          | <0.001  | 2904 |
| COPD                                                 | 41 (1%)        | 29 (2%)             | 12 (1%)            | 0.303   | 2904 |
| Asthma                                               | 399 (14%)      | 206 (12%)           | 193 (17%)          | <0.001  | 2904 |
| No Cause identified                                  | 127 (4%)       | 90 (5%)             | 37 (3%)            | 0.038   | 2904 |

|                         |                 |                  |                |        |      |
|-------------------------|-----------------|------------------|----------------|--------|------|
| Ventilation Management  |                 |                  |                |        |      |
| VT                      | 7.7±1.8         | 7.8±1.8          | 7.7±1.8        | 0.215  | 2758 |
| RR                      | 20±8            | 20±6.2           | 21±11          | <0.001 | 2887 |
| PEEP                    | 8.0 [5.0;10.0]  | 8.0 [5.0;10.0]   | 8.0 [5.0;10.0] | 0.405  | 2893 |
| FiO2                    | 0.6 [0.4;0.8]   | 0.5 [0.4;0.8]    | 0.6 [0.4;0.9]  | <0.001 | 2893 |
| Plateau pressure        | 23±6            | 22±6             | 24±6           | <0.001 | 907  |
| Driving pressure        | 15±6            | 14±5             | 16±6           | <0.001 | 905  |
| PIP                     | 26±8            | 26±8             | 28±8           | <0.001 | 2781 |
| Minute ventilation      | 10.7±4.7        | 10.6±4.5         | 10.9±5.0       | 0.113  | 2839 |
| Outcomes                |                 |                  |                |        |      |
| Duration of invasive MV | 7.0 [4.0;14.0]  | 7.0 [4.0;14.0]   | 7.0 [3.0;15.0] | 0.247  | 2753 |
| VFD                     | 14.0 [0.0;22.0] | 21.0 [14.0;24.0] | 0.0 [0.0;0.0]  | <0.001 | 2753 |
| ICU Length of Stay      | 10.0 [5.0;18.0] | 11.0 [6.0;20.0]  | 8.0 [4.0;16.0] | <0.001 | 2904 |
| Hospital Length of Stay | 17.0 [8.0;32.0] | 22.0 [13.0;40.0] | 9.0 [4.0;19.0] | <0.001 | 2849 |
| ICU mortality           | 962 (33%)       | 0 (0%)           | 962 (87%)      | 0.000  | 2904 |
| Hospital mortality      | 1111 (38%)      | 0 (0%)           | 1111 (100.0%)  | 0.000  | 2904 |

Table E4: Multivariable analyses of factors associated with hospital death in patients with unilateral infiltrate or ARDS

|                                             | Model with Bilateral opacities |            |         |  | Model with number of quadrants |            |         |
|---------------------------------------------|--------------------------------|------------|---------|--|--------------------------------|------------|---------|
|                                             | OR                             | 95%CI      | p-value |  | OR                             | 95%CI      | p-value |
| BILATERAL opacities                         | 1.32                           | 1.06; 1.64 | <0.013  |  | -                              | -          | -       |
| Number of quadrants (reference: 1 quadrant) | -                              | -          | -       |  |                                |            |         |
| 2 quadrants                                 | -                              | -          | -       |  | 1.17                           | 0.88; 1.56 | 0.284   |
| 3 quadrants                                 | -                              | -          | -       |  | 1.53                           | 1.10; 2.11 | 0.011   |
| 4 quadrants                                 | -                              | -          | -       |  | 1.76                           | 1.29; 2.41 | <0.001  |
| Age (for 1 year)                            | 1.02                           | 1.02; 1.03 | <0.001  |  | 1.02                           | 1.02; 1.03 | <0.001  |
| BMI (for 1 kg/m <sup>2</sup> )              | 0.98                           | 0.97; 1.00 | 0.011   |  | 0.98                           | 0.97; 1.00 | 0.015   |
| Medical admission                           | 1.98                           | 1.56; 2.51 | <0.001  |  | 1.86                           | 1.46; 2.38 | <0.001  |
| Trauma admission                            | 1.84                           | 1.10; 3.01 | 0.017   |  | 1.81                           | 1.07; 3.00 | 0.024   |
| Non-pulmonary SOFA                          | 1.13                           | 1.10; 1.16 | <0.001  |  | 1.13                           | 1.11; 1.16 | <0.001  |
| PF (for 10 mmHg decrease)                   | 1.02                           | 1.00; 1.03 | 0.028   |  | 1.01                           | 0.99; 1.02 | 0.218   |
| pH (for 0.01 increase)                      | 0.98                           | 0.97; 0.99 | <0.001  |  | 0.98                           | 0.98; 0.99 | <0.001  |
| RR (for 1/min)                              | 1.02                           | 1.01; 1.04 | 0.002   |  | 1.02                           | 1.01; 1.04 | 0.003   |
| PEEP (for 1cmH <sub>2</sub> O)              | 0.94                           | 0.91; 0.97 | <0.001  |  | 0.94                           | 0.91; 0.97 | <0.001  |
| PIP (for 1cmH <sub>2</sub> O)               | 1.02                           | 1.01; 1.03 | 0.002   |  | 1.02                           | 1.01; 1.03 | 0.006   |
| immunocompromised                           | 2.19                           | 1.76; 2.72 | <0.001  |  | 2.19                           | 1.75; 2.74 | <0.001  |
| Chronic liver Failure                       | 2.54                           | 1.60; 4.11 | <0.001  |  | 2.52                           | 1.57; 4.13 | <0.001  |
| Extra-pulmonary sepsis                      | 1.32                           | 1.04; 1.69 | 0.025   |  | 1.23                           | 0.95; 1.58 | 0.109   |
| Drug overdose                               | 0.45                           | 0.21; 0.90 | 0.031   |  | 0.40                           | 0.18; 0.83 | 0.019   |
| TRALI                                       | 1.60                           | 1.03; 2.47 | 0.034   |  | 1.56                           | 1.00; 2.42 | 0.005   |
| Concomitant Cardiac Failure                 | 1.34                           | 1.04; 1.73 | 0.025   |  | 1.39                           | 1.07; 1.81 | 0.013   |
| Income area (reference High income Europe)  |                                |            |         |  |                                |            |         |
| Middle Income                               | 1.58                           | 1.26; 1.99 | <0.001  |  | 1.71                           | 1.35; 2.17 | <0.001  |
| High Income non Europe                      | 0.62                           | 0.49; 0.87 | <0.001  |  | 0.59                           | 0.47; 0.75 | <0.001  |

**Table E5:** Multivariable analysis of variables associated with hospital mortality in patients with unilateral infiltrate

|                                            | OR   | 95%CI      | p-value |
|--------------------------------------------|------|------------|---------|
| Age (for 1 year)                           | 1.02 | 1.01; 1.03 | <0.001  |
| Medical admission                          | 2.27 | 1.51; 3.44 | <0.001  |
| Non-pulmonary SOFA                         | 1.19 | 1.13; 1.25 | <0.001  |
| pH (for 0.01 increase)                     | 0.98 | 0.97; 1.00 | 0.020   |
| PEEP (for 1cmH2O)                          | 0.88 | 0.81; 0.95 | 0.001   |
| Immunocompromised                          | 2.10 | 1.36; 3.23 | <0.001  |
| Income area (reference High income Europe) |      |            |         |
| Middle Income                              | 1.94 | 1.23; 3.07 | 0.004   |
| High Income non Europe                     | 0.67 | 0.42; 1.06 | 0.091   |



**Table E6:** Multivariable analysis of variables associated with hospital mortality in patients with 2 quadrants involved

|                                            | Model for patients with 2 quadrants |            |         |
|--------------------------------------------|-------------------------------------|------------|---------|
|                                            | OR                                  | 95%CI      | p-value |
| BILATERAL opacities                        | 1.13                                | 0.76; 1.69 | 0.56    |
| Age (for 1 year)                           | 1.02                                | 1.01; 1.03 | <0.001  |
| BMI (for 1 kg/m <sup>2</sup> )             | 0.99                                | 0.97; 1.01 | 0.404   |
| Medical admission                          | 2.42                                | 1.67; 3.54 | <0.001  |
| Trauma admission                           | 2.57                                | 1.18; 5.40 | 0.015   |
| Non-pulmonary SOFA                         | 1.08                                | 1.04; 1.13 | <0.001  |
| PF (for 10 mmHg decrease)                  | 0.99                                | 0.96; 1.01 | 0.310   |
| pH (for 0.01 increase)                     | 0.98                                | 0.97; 0.99 | 0.003   |
| RR (for 1/min)                             | 1.03                                | 1.01; 1.06 | 0.015   |
| PEEP (for 1cmH <sub>2</sub> O)             | 0.94                                | 0.89; 1.00 | 0.050   |
| PIP (for 1cmH <sub>2</sub> O)              | 1.01                                | 0.99; 1.03 | 0.200   |
| immunocompromised                          | 2.21                                | 1.53; 3.21 | <0.001  |
| Chronic liver Failure                      | 2.62                                | 1.14; 6.47 | 0.026   |
| Extra-pulm sepsis                          | 1.96                                | 1.32; 2.92 | <0.001  |
| Drug overdose                              | 2.27                                | 0.03; 0.98 | 0.080   |
| TRALI                                      | 3.11                                | 1.50; 6.47 | 0.002   |
| Concomitant Cardiac Failure                | 1.50                                | 1.00; 2.26 | 0.049   |
| Income area (reference High income Europe) |                                     |            |         |
| Middle Income                              | 1.44                                | 1.00; 2.06 | 0.049   |
| High Income non Europe                     | 0.67                                | 0.45; 0.99 | 0.044   |

**Table E7:** Baseline and outcomes of unilateral infiltrate patients according to their evolution

|                                    | Never developed<br>ARDS<br>N=579 | Did develop<br>ARDS<br>N=143 | p-<br>value | N   |
|------------------------------------|----------------------------------|------------------------------|-------------|-----|
| Age                                | 61.6±17.5                        | 64.0±16.1                    | 0.126       | 722 |
| Female gender                      | 214 (37.0%)                      | 40 (28.0%)                   | 0.055       | 722 |
| Weight                             | 75.2±18.2                        | 78.0±20.2                    | 0.147       | 691 |
| BMI                                | 26.3±6.1                         | 27.2±6.3                     | 0.135       | 674 |
| Obese                              | 105 (19.5%)                      | 31 (22.8%)                   | 0.465       | 674 |
| Comorbidities                      |                                  |                              |             |     |
| Diabetes                           | 128 (22.1%)                      | 30 (21.0%)                   | 0.858       | 722 |
| COPD                               | 147 (25.4%)                      | 32 (22.4%)                   | 0.523       | 722 |
| Chronic Renal Failure              | 56 (9.7%)                        | 12 (8.4%)                    | 0.757       | 722 |
| Immunosuppression                  | 111 (19.2%)                      | 22 (15.4%)                   | 0.355       | 722 |
| Chronic Cardiac Failure            | 57 (9.8%)                        | 14 (9.8%)                    | 1.000       | 722 |
| Chronic Liver Failure              | 23 (4.0%)                        | 5 (3.5%)                     | 0.982       | 722 |
| At least 1 comorbidity             | 346 (59.8%)                      | 79 (55.2%)                   | 0.375       | 722 |
| Risk factor for AHRF               |                                  |                              |             |     |
| Pneumonia                          | 271 (46.8%)                      | 77 (53.8%)                   | 0.157       | 722 |
| Non pulmonary Sepsis               | 81 (14.0%)                       | 22 (15.4%)                   | 0.769       | 722 |
| Gastric aspiration                 | 124 (21.4%)                      | 25 (17.5%)                   | 0.355       | 722 |
| Trauma                             | 34 (5.9%)                        | 13 (9.1%)                    | 0.227       | 722 |
| Pancreatitis                       | 9 (1.6%)                         | 1 (0.7%)                     | 0.696       | 722 |
| Pulmonary contusion                | 24 (4.1%)                        | 10 (7.0%)                    | 0.223       | 722 |
| Pulmonary Vasculitis               | 5 (0.9%)                         | 1 (0.7%)                     | 1.000       | 722 |
| Non cardiogenic Shock              | 38 (6.6%)                        | 8 (5.6%)                     | 0.815       | 722 |
| Overdose                           | 17 (2.9%)                        | 4 (2.8%)                     | 1.000       | 722 |
| TRALI                              | 17 (2.9%)                        | 7 (4.9%)                     | 0.294       | 722 |
| No Risk Factor identified          | 58 (10.0%)                       | 15 (10.5%)                   | 0.990       | 722 |
| Concomitant Cardiac Failure        | 61 (10.5%)                       | 14 (9.8%)                    | 0.914       | 722 |
| Concomitant Asthma                 | 8 (1.4%)                         | 3 (2.1%)                     | 0.463       | 722 |
| Concomitant COPDE                  | 81 (14.0%)                       | 22 (15.4%)                   | 0.769       | 722 |
| Type of admission                  |                                  |                              | 0.336       | 722 |
| Medical                            | 399 (68.9%)                      | 99 (69.2%)                   |             |     |
| Postoperative(elective)            | 45 (7.8%)                        | 6 (4.2%)                     |             |     |
| Surgical                           | 105 (18.1%)                      | 27 (18.9%)                   |             |     |
| Trauma                             | 30 (5.2%)                        | 11 (7.7%)                    |             |     |
| SOFA                               | 9.0 [6.0;12.0]                   | 9.6 [7.0;12.0]               | 0.145       | 711 |
| Non-pulmonary SOFA                 | 6.0 [3.8;9.0]                    | 6.2 [4.0;9.0]                | 0.247       | 709 |
| HD SOFA                            | 2.0±1.8                          | 2.4±1.7                      | 0.015       | 672 |
| Renal SOFA                         | 0.8±1.1                          | 0.9±1.1                      | 0.277       | 687 |
| Nb quadrants involved              |                                  |                              | 0.218       | 612 |
| 1                                  | 351 (72.7%)                      | 86 (66.7%)                   |             |     |
| 2                                  | 132 (27.3%)                      | 43 (33.3%)                   |             |     |
| First day with bilateral opacities |                                  |                              |             |     |
| - 3                                |                                  | 62 (43.3%)                   |             |     |
| - 5                                |                                  | 34 (23.7%)                   |             |     |
| - 7                                |                                  | 25 (17.4%)                   |             |     |

|                                    |                  |                  |        |     |
|------------------------------------|------------------|------------------|--------|-----|
| - 10                               |                  | 9 (6.3%)         |        |     |
| - 14                               |                  | 10 (7.0%)        |        |     |
| - 21                               |                  | 2 (1.4%)         |        |     |
| - 28                               |                  | 1 (0.7%)         |        |     |
| Ventilation and ABG                |                  |                  |        |     |
| PCO2                               | 44.5±15.1        | 45.9±15.6        | 0.319  | 707 |
| pH                                 | 7.35±0.12        | 7.33±0.11        | 0.047  | 707 |
| FiO2                               | 0.5 [0.4;0.6]    | 0.5 [0.4;0.8]    | 0.004  | 711 |
| SpO2                               | 97.0 [95.0;99.0] | 97.0 [95.0;99.0] | 0.705  | 489 |
| PO2                                | 79.2±50.0        | 84.8±49.2        | 0.226  | 711 |
| VT                                 | 7.9±1.9          | 8.0±1.9          | 0.664  | 680 |
| PF                                 | 191.9±62.9       | 182.6±67.0       | 0.138  | 711 |
| Worst PF in the 2 first days       | 181.7±62.1       | 166.5±64.3       | 0.012  | 722 |
| Initial Severity                   |                  |                  | 0.031  | 722 |
| Mild                               | 278 (48.0%)      | 52 (36.4%)       |        |     |
| Moderate                           | 243 (42.0%)      | 70 (49.0%)       |        |     |
| Severe                             | 58 (10.0%)       | 21 (14.7%)       |        |     |
| Worst severity in the 2 first days |                  |                  | 0.009  | 722 |
| Mild                               | 234 (40.4%)      | 43 (30.1%)       |        |     |
| Moderate                           | 277 (47.8%)      | 71 (49.7%)       |        |     |
| Severe                             | 68 (11.7%)       | 29 (20.3%)       |        |     |
| RR                                 | 19.1±5.6         | 19.0±5.4         | 0.814  | 711 |
| PEEP                               | 6.0 [5.0;8.0]    | 6.0 [5.0;8.0]    | 0.050  | 711 |
| Plateau pressure                   | 19.8±5.3         | 20.9±4.9         | 0.181  | 210 |
| Driving pressure                   | 12.9±5.0         | 13.7±4.6         | 0.291  | 210 |
| PIP                                | 24.2±7.6         | 26.9±9.0         | 0.002  | 676 |
| Minute ventilation                 | 10.11±4.40       | 10.55±4.46       | 0.292  | 701 |
| Outcomes                           |                  |                  |        |     |
| Duration of invasive MV            | 5.0 [3.0;10.0]   | 12.0 [8.0;20.0]  | <0.001 | 677 |
| VFD                                | 20.0 [0.0;24.0]  | 5.5 [0.0;18.0]   | <0.001 | 677 |
| ICU LOS                            | 8.0 [4.0;14.0]   | 16.0 [10.5;24.5] | <0.001 | 722 |
| Hosp LOS                           | 15.0 [8.0;28.2]  | 23.0 [14.0;42.0] | <0.001 | 705 |
| ICU mortality                      | 146 (25.2%)      | 42 (29.4%)       | 0.364  | 722 |
| Hospital mortality                 | 177 (30.7%)      | 52 (36.4%)       | 0.227  | 720 |

Table E8: Multivariable analysis of factors associated with evolution to ARDS in patients with initial unilateral infiltrate

|                           | Model for patients with 2 quadrants |            |         |
|---------------------------|-------------------------------------|------------|---------|
|                           | OR                                  | 95%CI      | p-value |
| Age (for 1 year)          | 1.01                                | 1.00; 1.01 | 0.073   |
| Non-pulmonary SOFA        | 1.01                                | 0.95; 1.06 | 0.837   |
| PF (for 10 mmHg decrease) | 1.01                                | 0.98; 1.04 | 0.643   |
| pH (for 0.01 increase)    | 0.99                                | 0.97; 1.00 | 0.280   |
| PIP (for 1cmH2O)          | 1.04                                | 1.01; 1.06 | 0.002   |

Figure E1: Distribution of tidal volume vs plateau pressure on day 1 in patients with unilateral infiltrate or with ARDS

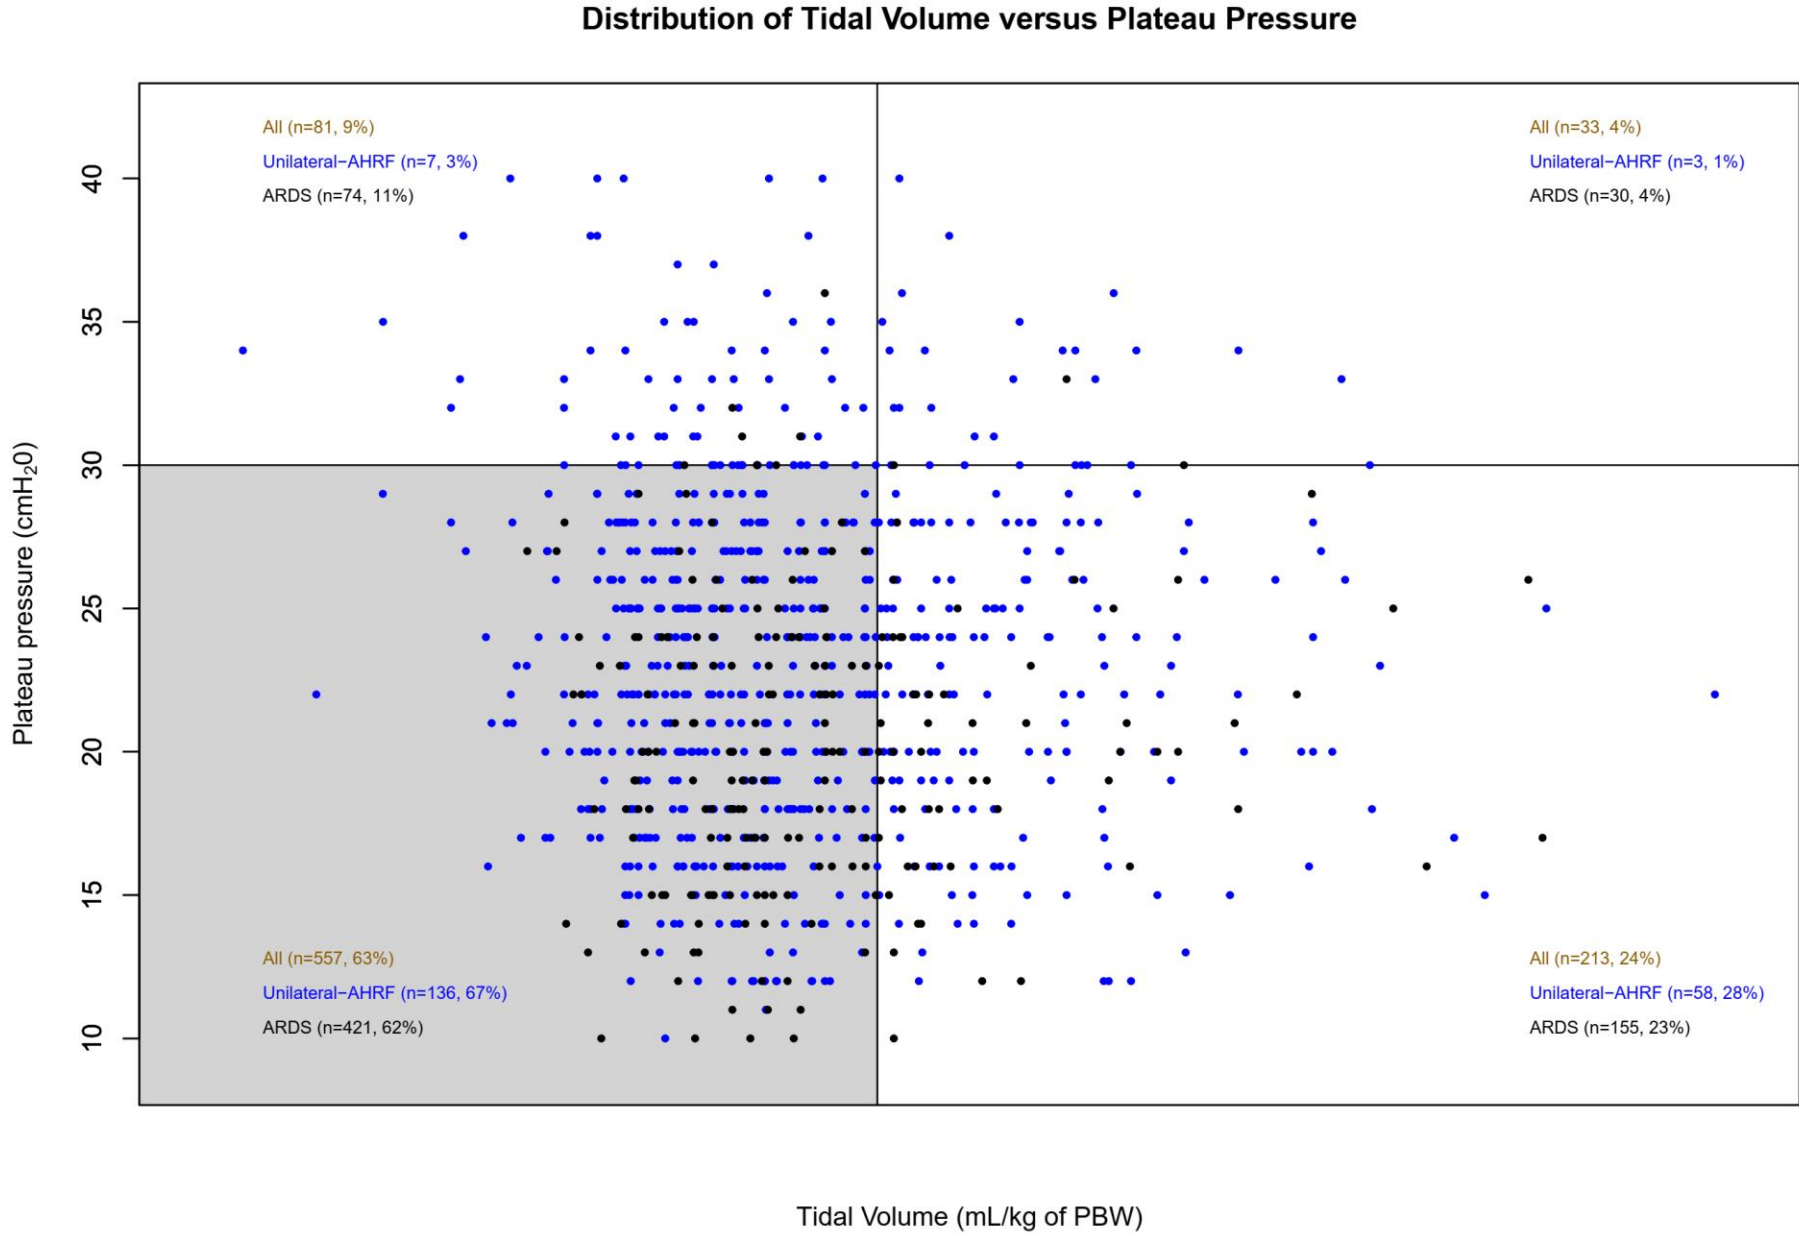

Supplement: inline-supplementary-material-1 [file inline-supplementary-material-1.pdf]
