# Supplementary material
Source: HighWire-hosted journal article supplement (https://erj.ersjournals.com/content/57/6/2003317)
Supplement: inline-supplementary-material-2 [file inline-supplementary-material-2.pdf]

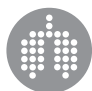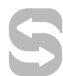

SHAREABLE PDF

# Outcome of acute hypoxaemic respiratory failure: insights from the LUNG SAFE Study

Tài Pham<sup>1,2,3,4</sup>, Antonio Pesenti<sup>5,6</sup>, Giacomo Bellani<sup>7,8</sup>, Gordon Rubinfeld<sup>9</sup>, Eddy Fan<sup>10,11</sup>, Guillermo Bugedo<sup>12</sup>, José Angel Lorente<sup>13,14,15</sup>, Antero do Vale Fernandes<sup>16</sup>, Frank Van Haren<sup>17,18,19</sup>, Alejandro Bruhn<sup>12</sup>, Fernando Rios<sup>20</sup>, Andres Esteban<sup>21</sup>, Luciano Gattinoni<sup>22</sup>, Anders Larsson<sup>23</sup>, Daniel F. McAuley<sup>24,25</sup>, Marco Ranieri<sup>26</sup>, B. Taylor Thompson<sup>27</sup>, Hermann Wrigge<sup>28,29</sup>, Laurent J. Brochard<sup>1,2,32</sup> and John G. Laffey<sup>1,2,30,31,32</sup>, on behalf of the LUNG SAFE Investigators and the European Society of Intensive Care Medicine Trials Group

**Affiliations:** <sup>1</sup>Keenan Research Centre, Li Ka Shing Knowledge Institute, St Michael's Hospital, Unity Health Toronto, Toronto, ON, Canada. <sup>2</sup>Interdepartmental Division of Critical Care Medicine, University of Toronto, Toronto, ON, Canada. <sup>3</sup>Université Paris-Saclay, AP-HP, Service de médecine intensive-réanimation, Hôpital de Bicêtre, DMU CORREVE, FHU SEPSIS, Groupe de recherche clinique CARMAS, Le Kremlin-Bicêtre, France. <sup>4</sup>Université Paris-Saclay, UVSQ, Université Paris-Sud, Inserm, Equipe d'Epidémiologie respiratoire intégrative, CESP, Villejuif, France. <sup>5</sup>Dipartimento di Anestesia, Rianimazione ed Emergenza Urgenza, Fondazione IRCCS Ca' Granda – Ospedale Maggiore Policlinico, Milan, Italy. <sup>6</sup>Dipartimento di Fisiopatologia Medico-Chirurgica e dei Trapianti, Università degli Studi di Milano, Milan, Italy. <sup>7</sup>School of Medicine and Surgery, University of Milan-Bicocca, Monza, Italy. <sup>8</sup>Dept of Emergency and Intensive Care, San Gerardo Hospital, Monza, Italy. <sup>9</sup>Interdepartmental Division of Critical Care Medicine, University of Toronto and Program in Trauma, Emergency and Critical Care, Sunnybrook Health Sciences Center, Toronto, ON, Canada. <sup>10</sup>Dept of Medicine, University Health Network and Mount Sinai Hospital, Toronto, ON, Canada. <sup>11</sup>Interdepartmental Division of Critical Care Medicine and Institute of Health Policy, Management and Evaluation, University of Toronto, Toronto, ON, Canada. <sup>12</sup>Departamento de Medicina Intensiva, Facultad de Medicina, Pontificia Universidad Católica de Chile, Santiago, Chile. <sup>13</sup>Critical Care Dept, Hospital Universitario de Getafe, Madrid, Spain. <sup>14</sup>CIBER Enfermedades Respiratorias, Madrid, Spain. <sup>15</sup>Universidad Europea, Madrid, Spain. <sup>16</sup>Serviço de Medicina Intensiva, Hospital Garcia de Orta, E.P.E, Almada, Portugal. <sup>17</sup>Intensive Care Unit, Canberra Hospital, Garran, Australia. <sup>18</sup>Australian National University Medical School, Canberra Hospital, Garran, Australia. <sup>19</sup>University of Canberra, Faculty of Health, Canberra, Australia. <sup>20</sup>Intensive Care Unit, Hospital Nacional Alejandro Posadas, Buenos Aires, Argentina. <sup>21</sup>Hospital Universitario de Getafe, Centro de Investigación en Red de Enfermedades Respiratorias (CIBERES), Madrid, Spain. <sup>22</sup>University of Göttingen, Dept of Anaesthesiology, Emergency and Intensive Care Medicine, Göttingen, Germany. <sup>23</sup>Dept of Medical Sciences, Uppsala University, Uppsala, Sweden. <sup>24</sup>Centre for Experimental Medicine, Queen's University Belfast, Belfast, UK. <sup>25</sup>Regional Intensive Care Unit, Royal Victoria Hospital, Belfast, UK. <sup>26</sup>Alma Mater Studiorum-Università di Bologna, Dipartimento di Scienze Mediche e Chirurgiche, Anesthesia and Intensive Care Medicine, Policlinico di Sant'Orsola, Bologna, Italy. <sup>27</sup>Massachusetts General Hospital, Harvard School of Medicine, Division of Pulmonary and Critical Care Medicine, Dept of Medicine, Boston, MA, USA. <sup>28</sup>Dept of Anesthesiology and Intensive Care Medicine, University Hospital Leipzig, Leipzig, Germany. <sup>29</sup>Dept of Anesthesiology, Intensive Care and Emergency Medicine, Pain Therapy, Bergmannstrost Hospital Halle, Halle, Germany. <sup>30</sup>Dept of Anesthesia, St Michael's Hospital and University of Toronto, Toronto, ON, Canada. <sup>31</sup>School of Medicine, and Regenerative Medicine Institute (REMEDI) at CÚRAM Centre for Research in Medical Devices, National University of Ireland Galway, Galway, Ireland. <sup>32</sup>Co-senior authors.

**Correspondence:** Laurent J. Brochard, Li Ka Shing Knowledge Institute, 209 Victoria Street, Room 4-08, Toronto, ON, M5B 1T8, Canada. E-mail: Laurent.brochard@unityhealth.to

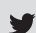

@ERSpublications

**Patients with hypoxaemic respiratory failure represent more than one-third of patients requiring mechanical ventilation and their mortality often exceeds 40%. Adjusting for severity, mortality is similar whether it is unilateral or bilateral (as in ARDS). <https://bit.ly/2VshdWc>**

**Cite this article as:** Pham T, Pesenti A, Bellani G, *et al.* Outcome of acute hypoxaemic respiratory failure: insights from the LUNG SAFE Study. *Eur Respir J* 2021; 57: 2003317 [<https://doi.org/10.1183/2003317>]

13993003.03317-2020].

This single-page version can be shared freely online.

#### ABSTRACT

**Background:** Current incidence and outcome of patients with acute hypoxaemic respiratory failure requiring mechanical ventilation in the intensive care unit (ICU) are unknown, especially for patients not meeting criteria for acute respiratory distress syndrome (ARDS).

**Methods:** An international, multicentre, prospective cohort study of patients presenting with hypoxaemia early in the course of mechanical ventilation, conducted during four consecutive weeks in the winter of 2014 in 459 ICUs from 50 countries (LUNG SAFE). Patients were enrolled with arterial oxygen tension/inspiratory oxygen fraction ratio  $\leq 300$  mmHg, new pulmonary infiltrates and need for mechanical ventilation with a positive end-expiratory pressure of  $\geq 5$  cmH<sub>2</sub>O. ICU prevalence, causes of hypoxaemia, hospital survival and factors associated with hospital mortality were measured. Patients with unilateral *versus* bilateral opacities were compared.

**Findings:** 12906 critically ill patients received mechanical ventilation and 34.9% with hypoxaemia and new infiltrates were enrolled, separated into ARDS (69.0%), unilateral infiltrate (22.7%) and congestive heart failure (CHF; 8.2%). The global hospital mortality was 38.6%. CHF patients had a mortality comparable to ARDS (44.1% *versus* 40.4%). Patients with unilateral-infiltrate had lower unadjusted mortality, but similar adjusted mortality compared to those with ARDS. The number of quadrants on chest imaging was associated with an increased risk of death. There was no difference in mortality comparing patients with unilateral-infiltrate and ARDS with only two quadrants involved.

**Interpretation:** More than one-third of patients receiving mechanical ventilation have hypoxaemia and new infiltrates with a hospital mortality of 38.6%. Survival is dependent on the degree of pulmonary involvement whether or not ARDS criteria are reached.
